# Supplementary material
Source: PubMed Central journal article supplement (PMC6681912)
Supplement: NIHMS1042419-supplement-1.pdf [file NIHMS1042419-supplement-1.pdf]

## Supporting Information

# Environmental Chemicals in an Urban Population of Pregnant Women and their Newborns from San Francisco

Rachel Morello-Frosch, Lara J. Cushing, Bill M. Jesdale, Jackie M. Schwartz, Weihong Guo, Tan Guo, Miaomiao Wang, Suhash Harwani, Syrago-Styliani E. Petropoulou, Wendy Duong, June-Soo Park, Myrto Petreas, Ryszard Gajek, Josephine Alvaran, Jianwen She, Dina Dobraca, Rupali Das, Tracey J. Woodruff

Number of pages: 12

Number of tables: 5

## Table of Contents

|                                                                                                                                                                                                                                                                                                                      |     |
|----------------------------------------------------------------------------------------------------------------------------------------------------------------------------------------------------------------------------------------------------------------------------------------------------------------------|-----|
| <b>Table S1</b> Characteristics of pregnant women participants in the Chemicals in Our Bodies study (2010-11).....                                                                                                                                                                                                   | S2  |
| <b>Table S2</b> List of chemicals measured in the Chemicals in Our Bodies Study.....                                                                                                                                                                                                                                 | S3  |
| <b>Table S3</b> Summary statistics for 59 chemicals measured in the maternal and umbilical cord serum (PCBs, OCPs, PBDEs, OH-PBDEs, PFCs, and lipids) and whole blood (metals) of pregnant women in the Chemicals in Our Bodies Study (2010-11) and National Health and Nutrition Examination Survey (2003-4). ..... | S5  |
| <b>Table S4</b> Chemicals detected in less than 20 paired maternal blood samples, their conditional probability of detection in matched umbilical cord blood samples, and Spearman’s rank correlation between maternal and umbilical cord concentrations (n=65 maternal/fetal pairs).....                            | S8  |
| <b>Table S5</b> Cord:maternal concentration ratios of chemicals measured in 65 paired maternal and umbilical cord blood samples, calculated after substituting the MDL/ $\sqrt{2}$ for values below the MDL.....                                                                                                     | S10 |
| <b>References</b> .....                                                                                                                                                                                                                                                                                              | S12 |

**Table S1** Characteristics of pregnant women participants in the Chemicals in Our Bodies study (2010-11).

|                         | <b>Enrolled<br/>(N=92)</b> | <b>Maternal blood<br/>sample (N=77)</b> | <b>Maternal/fetal<br/>pairs (N=65)</b> |
|-------------------------|----------------------------|-----------------------------------------|----------------------------------------|
|                         | <i>N (%)</i>               | <i>N (%)</i>                            | <i>N (%)</i>                           |
| <b>Race/ethnicity</b>   |                            |                                         |                                        |
| Latina                  | 65 (71%)                   | 53 (69%)                                | 48 (74%)                               |
| Black                   | 9 (10%)                    | 9 (12%)                                 | 6 (9%)                                 |
| White                   | 7 (8%)                     | 7 (9%)                                  | 6 (9%)                                 |
| Asian/PI                | 7 (8%)                     | 5 (6%)                                  | 3 (5%)                                 |
| Other                   | 4 (4%)                     | 3 (4%)                                  | 2 (3%)                                 |
| <b>Country of birth</b> |                            |                                         |                                        |
| United States           | 28 (30%)                   | 26 (34%)                                | 21 (32%)                               |
| Mexico                  | 31 (34%)                   | 27 (35%)                                | 23 (35%)                               |
| Other                   | 33 (36%)                   | 24 (31%)                                | 21 (32%)                               |
| <b>Household income</b> |                            |                                         |                                        |
| < \$20,000              | 32 (38%)                   | 27 (35%)                                | 23 (35%)                               |
| \$20,000-\$39,999       | 24 (28%)                   | 21 (27%)                                | 17 (26%)                               |
| \$40,000+               | 3 (3%)                     | 2 (3%)                                  | 2 (3%)                                 |
| missing                 | 33 (36%)                   | 27 (35%)                                | 23 (35%)                               |

**Table S2** List of chemicals measured in the Chemicals in Our Bodies Study

|                                                | Acronym             | Wet weight<br>MDL (µg/L) |
|------------------------------------------------|---------------------|--------------------------|
| <b>PCBs</b>                                    |                     |                          |
| 2,3',4,4'-tetrachlorobiphenyl                  | PCB-66              | 0.009                    |
| 2,4,4',5-tetrachlorobiphenyl                   | PCB-74              | 0.008                    |
| 2,2',4,4',5-pentachlorobiphenyl                | PCB-99              | 0.014                    |
| 2,2',4,5,5'-pentachlorobiphenyl                | PCB-101             | 0.016                    |
| 2,3,3',4,4'-pentachlorobiphenyl                | PCB-105             | 0.010                    |
| 2,3',4,4',5-pentachlorobiphenyl                | PCB-118             | 0.014                    |
| 2,2',3,4,4',5'-hexachlorobiphenyl              | PCB-138             | 0.006                    |
| 2,2',4,4',5,5'-hexachlorobiphenyl              | PCB-153             | 0.011                    |
| 2,3,3',4,4',5-hexachlorobiphenyl               | PCB-156             | 0.005                    |
| 2,2',3,3',4,4',5-heptachlorobiphenyl           | PCB-170             | 0.005                    |
| 2,2',3,4,4',5,5'-heptachlorobiphenyl           | PCB-180             | 0.007                    |
| 2,2',3,4,4',5',6-heptachlorobiphenyl           | PCB-183             | 0.012                    |
| 2,2',3,4',5,5',6-heptachlorobiphenyl           | PCB-187             | 0.009                    |
| 2,2',3,3',4,4',5,5'-octachlorobiphenyl         | PCB-194             | 0.007                    |
| 2,2',3,4,4',5,5',6-octachlorobiphenyl          | PCB-203             | 0.007                    |
| <b>Organochlorine pesticides (OCPs)</b>        |                     |                          |
| <i>p,p'</i> -dichlorodiphenyldichloroethene    | 4,4'-DDE            | 0.005                    |
| <i>o,p'</i> -dichlorodiphenyltrichloroethane   | 2,4'-DDT            | 0.005                    |
| <i>p,p'</i> -dichlorodiphenyltrichloroethane   | 4,4'-DDT            | 0.005                    |
| hexachlorobenzene                              | HCB                 | 0.034                    |
| beta-hexachlorocyclohexane                     | <i>b</i> -HCH       | 0.005                    |
| oxychlordane                                   | oxychlordane        | 0.005                    |
| <i>trans</i> -nonachlor                        | <i>t</i> -nonachlor | 0.006                    |
| <b>PBDEs</b>                                   |                     |                          |
| 2,2',4'-tri-bromodiphenyl ether                | BDE-17              | 0.005                    |
| 2,4,4'-tri-bromodiphenyl ether                 | BDE-28              | 0.005                    |
| 2,2',4,4'-tetra-bromodiphenyl ether            | BDE-47              | 0.023                    |
| 2,3',4,4'-tetra-bromodiphenyl ether            | BDE-66              | 0.005                    |
| 2,2',3,4,4'-penta-bromodiphenyl ether          | BDE-85              | 0.005                    |
| 2,2',4,4',5-penta-bromodiphenyl ether          | BDE-99              | 0.019                    |
| 2,2',4,4',6-penta-bromodiphenyl ether          | BDE-100             | 0.005                    |
| 2,2',4,4',5,5'-hexa-bromodiphenyl ether        | BDE-153             | 0.005                    |
| 2,2',4,4',5,6'-hexa-bromodiphenyl ether        | BDE-154             | 0.007                    |
| 2,2',3,4,4',5',6-hepta-bromodiphenyl ether     | BDE-183             | 0.007                    |
| 2,2',3,3',4,4',5,6'-octa-bromodiphenyl ether   | BDE-196             | 0.007                    |
| 2,2',3,3',4,4',6,6'-octa-bromodiphenyl ether   | BDE-197             | 0.007                    |
| 2,2',3,3',4,5',6,6'-octa-bromodiphenyl ether   | BDE-201             | 0.007                    |
| 2,2',3,3',5,5',6,6'-octa-bromodiphenyl ether   | BDE-202             | 0.007                    |
| 2,2',3,4,4',5,5',6-octa-bromodiphenyl ether    | BDE-203             | 0.007                    |
| 2,2',3,3',4,4',5,5',6-nona-bromodiphenyl ether | BDE-206             | 0.009                    |

|                                                      | <b>Acronym</b> | <b>Wet weight<br/>MDL (µg/L)</b> |
|------------------------------------------------------|----------------|----------------------------------|
| 2,2',3,3',4,4',5,6,6'-nona-bromodiphenyl ether       | BDE-207        | 0.009                            |
| 2,2',3,3',4,5,5',6,6'-nona-bromodiphenyl ether       | BDE-208        | 0.009                            |
| 2,2',3,3',4,4',5,5',6,6'-deca-bromodiphenyl ether    | BDE-209        | 0.045                            |
| <b>OH-PBDEs</b>                                      |                |                                  |
| 2'-hydroxy-2,3',4,5'-tetrabromodiphenyl ether        | 2'-OH-BDE-68   | 0.008                            |
| 4'-hydroxy-2,2',4,5'-tetrabromodiphenyl ether        | 4'-OH-BDE-49   | 0.008                            |
| 5-hydroxy-2,2',4,4'-tetrabromodiphenyl ether         | -OH-BDE-47     | 0.006                            |
| 6'-hydroxy-2,2',4,4',5-pentabromodiphenyl ether      | 6'-OH-BDE-99   | 0.012                            |
| <b>PFCs</b>                                          |                |                                  |
| perfluoroheptanoic acid                              | PFHpA          | 0.059                            |
| perfluorooctanoic acid                               | PFOA           | 0.301                            |
| perfluorononanoic acid                               | PFNA           | 0.075                            |
| perfluorodecanoic acid                               | PFDeA          | 0.032                            |
| perfluoroundecanoic acid                             | PFUA           | 0.010                            |
| perfluorododecanoic acid                             | PFDoA          | 0.036                            |
| perfluorobutane sulfonate                            | PFBS           | 0.022                            |
| perfluorooctane sulfonic acid                        | PFOS           | 0.083                            |
| perfluorooctane sulfonamide                          | PFOSA          | 0.009                            |
| 2-(N-methyl-perfluorooctane sulfonamido) acetic acid | N-Me-PFOSAA    | 0.013                            |
| 2-(N-ethyl-perfluorooctane sulfonamido) acetic acid  | N-Et-PFOSAA    | 0.011                            |
| <b>Metals</b>                                        |                |                                  |
| Cadmium                                              | Cd             | 0.15                             |
| Lead                                                 | Pb             | 0.0027                           |
| Mercury                                              | Hg             | 0.064                            |

**Table S3** Summary statistics for 59 chemicals measured in the maternal and umbilical cord serum (PCBs, OCPs, PBDEs, OH-PBDEs, PFCs, and lipids) and whole blood (metals) of pregnant women in the Chemicals in Our Bodies Study (2010-11) and National Health and Nutrition Examination Survey (2003-4).

|                          | Chemicals in Our Bodies Study (2010-11)      |                        |                                                           |                                              |                        |                                                           | NHANES (2003-4) <sup>a</sup>      |                        |                                                           |  |
|--------------------------|----------------------------------------------|------------------------|-----------------------------------------------------------|----------------------------------------------|------------------------|-----------------------------------------------------------|-----------------------------------|------------------------|-----------------------------------------------------------|--|
|                          | Maternal blood (N=77)                        |                        |                                                           | Umbilical Cord blood (N=65) <sup>b</sup>     |                        |                                                           | Maternal blood                    |                        |                                                           |  |
|                          | <i>N</i> (%)<br><i>detected</i> <sup>c</sup> | <i>GM</i> <sup>d</sup> | <i>95</i> <sup>th</sup><br><i>percentile</i> <sup>d</sup> | <i>N</i> (%)<br><i>detected</i> <sup>c</sup> | <i>GM</i> <sup>d</sup> | <i>95</i> <sup>th</sup><br><i>percentile</i> <sup>d</sup> | %<br><i>detected</i> <sup>c</sup> | <i>GM</i> <sup>d</sup> | <i>95</i> <sup>th</sup><br><i>percentile</i> <sup>d</sup> |  |
| <b>PCBs (µg/g lipid)</b> |                                              |                        |                                                           |                                              |                        |                                                           |                                   |                        |                                                           |  |
| PCB-66                   | 4 (5%)                                       | -- <sup>e</sup>        | -- <sup>f</sup>                                           | 0 (0%)                                       | -- <sup>e</sup>        | -- <sup>f</sup>                                           | (100%)                            | 1.27                   | 2.6                                                       |  |
| PCB-74                   | 8 (10%)                                      | -- <sup>e</sup>        | 1.59                                                      | 1 (2%)                                       | -- <sup>e</sup>        | -- <sup>f</sup>                                           | (100%)                            | 2.87                   | 7.4                                                       |  |
| PCB-99                   | 14 (18%)                                     | -- <sup>e</sup>        | 2.98                                                      | 10 (6%)                                      | -- <sup>e</sup>        | -- <sup>f</sup>                                           | (100%)                            | 2.87                   | 9.6                                                       |  |
| PCB-101                  | 15 (19%)                                     | -- <sup>e</sup>        | 3.25                                                      | 20 (12%)                                     | -- <sup>e</sup>        | 9.54                                                      | (100%)                            | 1.58                   | 3.8                                                       |  |
| PCB-105                  | 5 (7%)                                       | -- <sup>e</sup>        | -- <sup>f</sup>                                           | 2 (3%)                                       | -- <sup>e</sup>        | -- <sup>f</sup>                                           | (100%)                            | 1.07                   | 3.3                                                       |  |
| PCB-118                  | 24 (31%)                                     | -- <sup>e</sup>        | 3.70                                                      | 10 (16%)                                     | -- <sup>e</sup>        | 7.34                                                      | (100%)                            | 4.31                   | 14.3                                                      |  |
| PCB-138                  | 72 (94%)                                     | 1.94                   | 5.11                                                      | 43 (68%)                                     | 3.05                   | 6.57                                                      | (100%) <sup>g</sup>               | 7.70 <sup>g</sup>      | 20.2 <sup>g</sup>                                         |  |
| PCB-153                  | 67 (88%)                                     | 3.00                   | 7.85                                                      | 30 (48%)                                     | -- <sup>e</sup>        | 7.58                                                      | (100%)                            | 8.74                   | 22.5                                                      |  |
| PCB-156                  | 19 (26%)                                     | -- <sup>e</sup>        | 1.13                                                      | 1 (2%)                                       | -- <sup>e</sup>        | -- <sup>f</sup>                                           | (90%)                             | 1.01                   | 3.0                                                       |  |
| PCB-170                  | 42 (55%)                                     | -- <sup>e</sup>        | 1.95                                                      | 4 (6%)                                       | -- <sup>e</sup>        | -- <sup>f</sup>                                           | (99%)                             | 2.08                   | 6.0                                                       |  |
| PCB-180                  | 67 (88%)                                     | 1.97                   | 5.75                                                      | 19 (30%)                                     | -- <sup>e</sup>        | 5.50                                                      | (96%)                             | 4.61                   | 13.2                                                      |  |
| PCB-183                  | 2 (3%)                                       | -- <sup>e</sup>        | -- <sup>f</sup>                                           | 0 (0%)                                       | -- <sup>e</sup>        | -- <sup>f</sup>                                           | (88%)                             | 0.62                   | 1.9                                                       |  |
| PCB-187                  | 22 (31%)                                     | -- <sup>e</sup>        | 2.25                                                      | 2 (3%)                                       | -- <sup>e</sup>        | -- <sup>f</sup>                                           | (96%)                             | 1.66                   | 4.1                                                       |  |
| PCB-194                  | 12 (16%)                                     | -- <sup>e</sup>        | 1.42                                                      | 0 (0%)                                       | -- <sup>e</sup>        | -- <sup>f</sup>                                           | (78%)                             | 0.65                   | 3.5                                                       |  |
| PCB-203                  | 20 (26%)                                     | -- <sup>e</sup>        | 2.98                                                      | 1 (2%)                                       | -- <sup>e</sup>        | -- <sup>f</sup>                                           | (89%) <sup>h</sup>                | 0.86 <sup>h</sup>      | 2.8 <sup>h</sup>                                          |  |
| <b>OCPs (µg/g lipid)</b> |                                              |                        |                                                           |                                              |                        |                                                           |                                   |                        |                                                           |  |
| 4,4'-DDE                 | 77 (100%)                                    | 112.53                 | 1,520.00                                                  | 62 (98%)                                     | 119.71                 | 1,950.00                                                  | (100%)                            | 140.39                 | 850.0                                                     |  |
| 2,4'-DDT                 | 5 (7%)                                       | -- <sup>e</sup>        | 1.52                                                      | 3 (5%)                                       | -- <sup>e</sup>        | -- <sup>f</sup>                                           | (3%)                              | -- <sup>e</sup>        | -- <sup>f</sup>                                           |  |
| 4,4'-DDT                 | 19 (25%)                                     | -- <sup>e</sup>        | 35.20                                                     | 7 (11%)                                      | -- <sup>e</sup>        | 43.80                                                     | (62%)                             | -- <sup>f</sup>        | 37.4                                                      |  |
| HCB                      | 77 (100%)                                    | 8.34                   | 16.90                                                     | 63 (100%)                                    | 16.35                  | 39.10                                                     | (100%)                            | 11.27                  | 25.7                                                      |  |
| <i>b</i> -HCH            | 49 (64%)                                     | 1.87                   | 20.60                                                     | 30 (48%)                                     | -- <sup>e</sup>        | 27.50                                                     | (80%)                             | -- <sup>f</sup>        | 22.0                                                      |  |
| oxychlorodane            | 51 (66%)                                     | 1.06                   | 5.02                                                      | 5 (8%)                                       | -- <sup>e</sup>        | -- <sup>f</sup>                                           | (81%)                             | -- <sup>f</sup>        | 11.4                                                      |  |
| <i>t</i> -nonachlor      | 60 (78%)                                     | 1.69                   | 6.68                                                      | 26 (41%)                                     | -- <sup>e</sup>        | 4.94                                                      | (94%)                             | -- <sup>f</sup>        | 16.9                                                      |  |

| PBDEs (µg/g lipid) |    |       |       |        |    |       |       |       |        |       |       |
|--------------------|----|-------|-------|--------|----|-------|-------|-------|--------|-------|-------|
| BDE-17             | 0  | (0%)  | --e   | --f    | 2  | (3%)  | --e   | --f   | (11%)  | --e   | --f   |
| BDE-28             | 28 | (36%) | --e   | 2.73   | 8  | (13%) | --e   | 3.05  | (90%)  | 1.27  | 3.8   |
| BDE-47             | 71 | (92%) | 9.56  | 104.00 | 42 | (67%) | 14.43 | 81.90 | (99%)  | 23.90 | 100.0 |
| BDE-66             | 3  | (4%)  | --e   | --f    | 0  | (0%)  | --e   | --f   | (16%)  | --e   | --f   |
| BDE-85             | 5  | (6%)  | --e   | 1.83   | 2  | (3%)  | --e   | --f   | (33%)  | --e   | --f   |
| BDE-99             | 47 | (61%) | 3.31  | 24.40  | 16 | (25%) | --e   | 18.90 | (87%)  | 5.51  | 21.8  |
| BDE-100            | 69 | (90%) | 2.17  | 15.60  | 35 | (56%) | --e   | 10.60 | (99%)  | 6.06  | 23.2  |
| BDE-153            | 69 | (90%) | 2.64  | 19.40  | 23 | (37%) | --e   | 11.20 | (100%) | 9.90  | 127.0 |
| BDE-154            | 7  | (9%)  | --e   | --f    | 0  | (0%)  | --e   | --f   | (64%)  | 0.63  | --f   |
| BDE-183            | 3  | (5%)  | --e   | --f    | 1  | (2%)  | --e   | --f   | (10%)  | --e   | --f   |
| BDE-196            | 2  | (3%)  | --e   | --f    | 0  | (0%)  | --e   | --f   | --i    | --i   | --i   |
| BDE-197            | 28 | (36%) | --e   | 2.01   | 0  | (0%)  | --e   | --f   | --i    | --i   | --i   |
| BDE-201            | 2  | (3%)  | --e   | --f    | 0  | (0%)  | --e   | --f   | --i    | --i   | --i   |
| BDE-202            | 0  | (0%)  | --e   | --f    | 0  | (0%)  | --e   | --f   | --i    | --i   | --i   |
| BDE-203            | 1  | (2%)  | --e   | --f    | 0  | (0%)  | --e   | --f   | --i    | --i   | --i   |
| BDE-206            | 3  | (5%)  | --e   | --f    | 2  | (3%)  | --e   | --f   | --i    | --i   | --i   |
| BDE-207            | 18 | (23%) | --e   | 3.02   | 2  | (3%)  | --e   | --f   | --i    | --i   | --i   |
| BDE-208            | 7  | (9%)  | --e   | 1.45   | 1  | (1%)  | --e   | --f   | --i    | --i   | --i   |
| BDE-209            | 41 | (53%) | --e   | 16.00  | 11 | (17%) | --e   | 37.10 | --i    | --i   | --i   |
| OH-PBDEs (ng/L)    |    |       |       |        |    |       |       |       |        |       |       |
| 2'-OH-BDE-68       | 5  | (6%)  | --e   | 9.08   | 1  | (2%)  | --e   | 5.66  | --i    | --i   | --i   |
| 4'-OH-BDE-49       | 31 | (40%) | --e   | 44.80  | 22 | (37%) | --e   | 32.55 | --i    | --i   | --i   |
| 5--OH-BDE-47       | 55 | (71%) | 14.25 | 86.60  | 45 | (75%) | 17.45 | 92.50 | --i    | --i   | --i   |
| 6'-OH-BDE-99       | 0  | (0%)  | --e   | --f    | 2  | (3%)  | --e   | --f   | --i    | --i   | --i   |
| PFCs (µg/L)        |    |       |       |        |    |       |       |       |        |       |       |
| PFHpA              | 25 | (33%) | --e   | 0.20   | 36 | (56%) | --e   | 0.23  | (11%)  | --e   | 0.4   |
| PFOA               | 49 | (64%) | 0.47  | 2.14   | 36 | (56%) | --e   | 1.68  | (99%)  | 2.39  | 5.6   |
| PFNA               | 76 | (99%) | 0.73  | 2.11   | 62 | (97%) | 0.29  | 0.93  | (99%)  | 0.70  | 1.5   |
| PFDeA              | 20 | (26%) | --e   | 0.78   | 6  | (9%)  | --e   | 0.49  | (8%)   | --e   | 0.4   |
| PFUA               | 71 | (92%) | 0.13  | 0.60   | 54 | (84%) | 0.03  | 0.16  | (1%)   | --e   | --f   |
| PFDoA              | 3  | (4%)  | --e   | --f    | 0  | (0%)  | --e   | --f   | (0%)   | --e   | --f   |
| PFBS               | 4  | (5%)  | --e   | 0.02   | 16 | (25%) | --e   | 0.03  | (1%)   | --e   | --f   |

|                    |    |        |                 |       |    |        |                 |                 |                 |                 |                 |
|--------------------|----|--------|-----------------|-------|----|--------|-----------------|-----------------|-----------------|-----------------|-----------------|
| PFOS               | 77 | (100%) | 2.55            | 7.25  | 64 | (100%) | 2.27            | 4.35            | (99%)           | 12.29           | 21.8            |
| PFOSA              | 69 | (90%)  | 0.02            | 0.07  | 58 | (91%)  | 0.02            | 0.10            | (15%)           | -- <sup>e</sup> | 0.3             |
| N-MeFOSAA          | 75 | (97%)  | 0.07            | 0.39  | 61 | (95%)  | 0.07            | 0.38            | (16%)           | -- <sup>e</sup> | 1.0             |
| N-EtFOSAA          | 40 | (52%)  | -- <sup>e</sup> | 0.03  | 40 | (63%)  | 0.02            | 0.05            | (0%)            | -- <sup>e</sup> | -- <sup>f</sup> |
| <b>Metals</b>      |    |        |                 |       |    |        |                 |                 |                 |                 |                 |
| Cd (µg/L)          | 64 | (83%)  | 0.22            | 0.49  | 0  | (0%)   | -- <sup>e</sup> | -- <sup>f</sup> | (66%)           | 0.22            | 0.8             |
| Pb (µg/dL)         | 77 | (100%) | 0.65            | 2.14  | 59 | (100%) | 0.40            | 1.20            | (94%)           | 0.68            | 1.8             |
| Hg (µg/L)          | 77 | (100%) | 0.45            | 1.62  | 59 | (100%) | 0.59            | 2.93            | (89%)           | 0.67            | 3.4             |
| Total lipids (g/L) | 77 | (100%) | 8.00            | 11.17 | 63 | (100%) | 2.53            | 3.57            | -- <sup>1</sup> | -- <sup>1</sup> | -- <sup>1</sup> |

Abbreviations: MDL (method detection limit). GM (geometric mean). LOD (limit of detection). See **Table S2** for full chemical names.

<sup>a</sup> NHANES results are from Woodruff et al. (2011). The number of women sampled was 253 for metals and between 70 and 76 for other analytes.

<sup>b</sup> 65 umbilical cord samples were collected. The number of cord samples analyzed varies by chemical class due to inadequate quantity of sample as follows: n=63 for PBDEs, PCBs, OCPs, and total lipids; n=60 for OH-PBDEs; n=64 for PFCs; and n=59 for metals.

<sup>c</sup> Detection refers to samples with concentrations  $\geq$  MDL or  $\geq$  LOD.

<sup>d</sup> For purposes of comparability with the values reported in Woodruff et al. (2011), geometric mean and 95<sup>th</sup> percentiles were calculated after substituting MDL/ $\sqrt{2}$  for missing values.

<sup>e</sup> GMs were not calculated when the detection frequency was below 60%.

<sup>f</sup> GM or percentile estimate is not reported because it is less than the maximum LOD.

<sup>g</sup> Includes PCB-138 and PCB-158.

<sup>h</sup> Includes PCB-196 and PCB-203.

<sup>i</sup> Analyte was not reported in NHANES.

**Table S4** Chemicals detected in less than 20 paired maternal blood samples, their conditional probability of detection in matched umbilical cord blood samples, and Spearman's rank correlation between maternal and umbilical cord concentrations (n=65 maternal/fetal pairs).<sup>a</sup>

| Analyte (matrix)     | Wet-weight MDL (µg/L) | N (%) ≥ MDL, maternal sample | Conditional probability of detection in cord sample | Correlation (lipid-adjusted) <sup>b</sup> |                   | Correlation (wet weight) <sup>b</sup> |                   |
|----------------------|-----------------------|------------------------------|-----------------------------------------------------|-------------------------------------------|-------------------|---------------------------------------|-------------------|
|                      |                       |                              |                                                     | $\rho$                                    | <i>p</i> -value   | $\rho$                                | <i>p</i> -value   |
| <b>PCBs (serum)</b>  |                       |                              |                                                     |                                           |                   |                                       |                   |
| PCB-66               | 0.009                 | 4 (6%)                       | 0%                                                  | -- <sup>c</sup>                           | -- <sup>c</sup>   | -- <sup>c</sup>                       | -- <sup>c</sup>   |
| PCB-74               | 0.008                 | 8 (13%)                      | 13%                                                 | 0.37                                      | 0.0025            | 0.37                                  | 0.0025            |
| PCB-99               | 0.014                 | 14 (22%)                     | 50%                                                 | 0.50                                      | <0.0001           | 0.53                                  | <0.0001           |
| PCB-101              | 0.016                 | 15 (24%)                     | 60%                                                 | 0.32                                      | 0.0106            | 0.37                                  | 0.0028            |
| PCB-105              | 0.010                 | 5 (8%)                       | 0%                                                  | -0.05                                     | 0.68              | -0.05                                 | 0.68              |
| PCB-156              | 0.005                 | 18 (29%)                     | 0%                                                  | -0.08                                     | 0.54              | -0.08                                 | 0.54              |
| PCB-183              | 0.012                 | 1 (2%)                       | 0%                                                  | -- <sup>c</sup>                           | -- <sup>c</sup>   | -- <sup>c</sup>                       | -- <sup>c</sup>   |
| PCB-187              | 0.009                 | 19 (30%)                     | 11%                                                 | 0.21                                      | 0.10              | 0.24                                  | 0.06              |
| PCB-194              | 0.007                 | 10 (16%)                     | 0%                                                  | -- <sup>c</sup>                           | -- <sup>c</sup>   | -- <sup>c</sup>                       | -- <sup>c</sup>   |
| PCB-203              | 0.007                 | 17 (27%)                     | 6%                                                  | 0.15                                      | 0.24              | 0.26                                  | 0.04              |
| <b>OCPs (serum)</b>  |                       |                              |                                                     |                                           |                   |                                       |                   |
| 2,4'-DDT             | 0.005                 | 4 (6%)                       | 50%                                                 | 0.58                                      | <0.0001           | 0.58                                  | <0.0001           |
| 4,4'-DDT             | 0.005                 | 16 (25%)                     | 38%                                                 | 0.59                                      | <0.0001           | 0.59                                  | <0.0001           |
| <b>PBDEs (serum)</b> |                       |                              |                                                     |                                           |                   |                                       |                   |
| BDE-17               | 0.005                 | 0 (0%)                       | -- <sup>d</sup>                                     | -- <sup>d</sup>                           | -- <sup>d</sup>   | -- <sup>d</sup>                       | -- <sup>d</sup>   |
| BDE-66               | 0.005                 | 4 (6%)                       | 0%                                                  | -- <sup>c</sup>                           | -- <sup>c</sup>   | -- <sup>c</sup>                       | -- <sup>c</sup>   |
| BDE-85               | 0.005                 | 4 (6%)                       | 50%                                                 | 0.72                                      | <0.0001           | 0.71                                  | <0.0001           |
| BDE-154              | 0.007                 | 5 (8%)                       | 0%                                                  | -- <sup>c</sup>                           | -- <sup>c</sup>   | -- <sup>c</sup>                       | -- <sup>c</sup>   |
| BDE-183              | 0.007                 | 2 (3%)                       | 0%                                                  | -0.02                                     | 0.86              | -0.02                                 | 0.86              |
| BDE-196              | 0.007                 | 2 (3%)                       | 0%                                                  | -- <sup>c</sup>                           | -- <sup>c</sup>   | -- <sup>c</sup>                       | -- <sup>c</sup>   |
| BDE-201              | 0.007                 | 1 (2%)                       | 0%                                                  | -- <sup>c</sup>                           | -- <sup>c</sup>   | -- <sup>c</sup>                       | -- <sup>c</sup>   |
| BDE-202              | 0.007                 | 0 (0%)                       | -- <sup>d</sup>                                     | -- <sup>c,d</sup>                         | -- <sup>c,d</sup> | -- <sup>c,d</sup>                     | -- <sup>c,d</sup> |
| BDE-203              | 0.007                 | 1 (2%)                       | 0%                                                  | -- <sup>c</sup>                           | -- <sup>c</sup>   | -- <sup>c</sup>                       | -- <sup>c</sup>   |



|                  |       |          |                 |                 |                 |                 |                 |
|------------------|-------|----------|-----------------|-----------------|-----------------|-----------------|-----------------|
| BDE-206          | 0.009 | 2 (3%)   | 100%            | -0.03           | 0.80            | -0.03           | 0.80            |
| BDE-207          | 0.009 | 11 (17%) | 18%             | -0.08           | 0.52            | -0.08           | 0.52            |
| BDE-208          | 0.009 | 7 (11%)  | 14%             | 0.38            | 0.0019          | 0.39            | 0.0016          |
| OH-PBDEs (serum) |       |          |                 |                 |                 |                 |                 |
| 2'-OH-BDE-68     | 0.008 | 2 (3%)   | 0%              | -- <sup>e</sup> | -- <sup>e</sup> | -0.02           | 0.85            |
| 6'-OH-BDE-99     | 0.012 | 0 (0%)   | -- <sup>d</sup> | -- <sup>e</sup> | -- <sup>e</sup> | -- <sup>d</sup> | -- <sup>d</sup> |
| PFCs (serum)     |       |          |                 |                 |                 |                 |                 |
| PFDeA            | 0.032 | 19 (30%) | 32%             | -- <sup>e</sup> | -- <sup>e</sup> | 0.51            | <0.0001         |
| PFDoA            | 0.036 | 3 (5%)   | 0%              | -- <sup>e</sup> | -- <sup>e</sup> | -- <sup>c</sup> | -- <sup>c</sup> |
| PFBS             | 0.022 | 3 (5%)   | 33%             | -- <sup>e</sup> | -- <sup>e</sup> | 0.08            | 0.56            |

Abbreviations: MDL (method detection limit). PCBs (polychlorinated biphenyls); OCPs (organochlorine pesticides); PBDEs (polybrominated diethyl ethers); OH-PBDEs (hydroxylated PBDE metabolites); PFCs (perfluorinated compounds). ). See **Table S2** for full chemical names.

<sup>a</sup> The number of paired samples varied by chemical class due to inadequate quantity of cord blood as follows: n=63 for PCBs, OCPs, and PBDEs; n=60 for OH-PBDEs; n=64 for PFCs; and n=59 for metals. Detection refers to a measured concentration  $\geq$  MDL. Conditional probabilities of detection are conditional on detection in the maternal sample. Correlation coefficients are not conditional on detection in the maternal sample. That is, when calculating the correlation coefficients, we included pairs for which chemicals were detected in the cord but not the maternal sample.

<sup>c</sup> Could not be calculated due to lack of cord samples  $\geq$  MDL.

<sup>d</sup> Could not be calculated due to lack of maternal samples  $\geq$  MDL.

<sup>e</sup> Not calculated for hydrophilic analytes.

**Table S5** Cord:maternal concentration ratios of chemicals measured in 65 paired maternal and umbilical cord blood samples, calculated after substituting the MDL/ $\sqrt{2}$  for values below the MDL.<sup>a</sup>

| Analyte (matrix)        | Complete pairs | N (%) incomplete pairs <sup>b</sup> | Cord:maternal ratio (lipid-adjusted) <sup>c</sup> |                 |                 | Cord:maternal ratio (wet-weight) <sup>d</sup> |                 |                 |
|-------------------------|----------------|-------------------------------------|---------------------------------------------------|-----------------|-----------------|-----------------------------------------------|-----------------|-----------------|
|                         |                |                                     | Median                                            | IQR             | GCV             | Median                                        | IQR             | GCV             |
| <b>PCBs (serum)</b>     |                |                                     |                                                   |                 |                 |                                               |                 |                 |
| PCB-118                 | 6              | 20 (77%)                            | -- <sup>e</sup>                                   | -- <sup>e</sup> | -- <sup>e</sup> | -- <sup>e</sup>                               | -- <sup>e</sup> | -- <sup>e</sup> |
| PCB-138                 | 43             | 16 (27%)                            | 1.5                                               | 1.1-2.1         | 72.6            | 0.5                                           | 0.3-0.7         | 72.8            |
| PCB-153                 | 30             | 26 (46%)                            | 1.2                                               | 1.0-1.6         | 58.2            | 0.4                                           | 0.3-0.5         | 61.6            |
| PCB-170                 | 3              | 35 (92%)                            | -- <sup>e</sup>                                   | -- <sup>e</sup> | -- <sup>e</sup> | -- <sup>e</sup>                               | -- <sup>e</sup> | -- <sup>e</sup> |
| PCB-180                 | 19             | 35 (65%)                            | -- <sup>e</sup>                                   | -- <sup>e</sup> | -- <sup>e</sup> | -- <sup>e</sup>                               | -- <sup>e</sup> | -- <sup>e</sup> |
| <b>OCPs (serum)</b>     |                |                                     |                                                   |                 |                 |                                               |                 |                 |
| 4,4'-DDE                | 62             | 1 (2%)                              | 1.1                                               | 1.0-1.2         | 115.6           | 0.4                                           | 0.3-0.4         | 123.3           |
| HCB                     | 63             | 0 (0%)                              | 1.8                                               | 1.5-2.4         | 55.0            | 0.6                                           | 0.5-0.7         | 51.1            |
| <i>b</i> -HCH           | 28             | 16 (36%)                            | 1.0                                               | 0.9-1.2         | 94.3            | 0.3                                           | 0.3-0.4         | 87.1            |
| oxychlorane             | 3              | 40 (93%)                            | -- <sup>e</sup>                                   | -- <sup>e</sup> | -- <sup>e</sup> | -- <sup>e</sup>                               | -- <sup>e</sup> | -- <sup>e</sup> |
| <i>t</i> -nonachlor     | 24             | 27 (53%)                            | -- <sup>e</sup>                                   | -- <sup>e</sup> | -- <sup>e</sup> | -- <sup>e</sup>                               | -- <sup>e</sup> | -- <sup>e</sup> |
| <b>PBDEs (serum)</b>    |                |                                     |                                                   |                 |                 |                                               |                 |                 |
| BDE-28                  | 7              | 15 (68%)                            | -- <sup>e</sup>                                   | -- <sup>e</sup> | -- <sup>e</sup> | -- <sup>e</sup>                               | -- <sup>e</sup> | -- <sup>e</sup> |
| BDE-47                  | 39             | 21 (35%)                            | 1.5                                               | 1.1-1.9         | 75.9            | 0.5                                           | 0.4-0.6         | 71.4            |
| BDE-99                  | 14             | 23 (62%)                            | -- <sup>e</sup>                                   | -- <sup>e</sup> | -- <sup>e</sup> | -- <sup>e</sup>                               | -- <sup>e</sup> | -- <sup>e</sup> |
| BDE-100                 | 32             | 28 (47%)                            | 1.2                                               | 0.8-2.1         | 124.2           | 0.4                                           | 0.3-0.6         | 123.6           |
| BDE-153                 | 23             | 34 (60%)                            | -- <sup>e</sup>                                   | -- <sup>e</sup> | -- <sup>e</sup> | -- <sup>e</sup>                               | -- <sup>e</sup> | -- <sup>e</sup> |
| BDE-197                 | 0              | 21 (100%)                           | -- <sup>e</sup>                                   | -- <sup>e</sup> | -- <sup>e</sup> | -- <sup>e</sup>                               | -- <sup>e</sup> | -- <sup>e</sup> |
| BDE-209                 | 4              | 33 (89%)                            | -- <sup>e</sup>                                   | -- <sup>e</sup> | -- <sup>e</sup> | -- <sup>e</sup>                               | -- <sup>e</sup> | -- <sup>e</sup> |
| <b>OH-PBDEs (serum)</b> |                |                                     |                                                   |                 |                 |                                               |                 |                 |
| 4'-OH-BDE-49            | 11             | 24 (69%)                            | -- <sup>f</sup>                                   | -- <sup>f</sup> | -- <sup>f</sup> | -- <sup>e</sup>                               | -- <sup>e</sup> | -- <sup>e</sup> |
| 5'-OH-BDE-47            | 37             | 13 (26%)                            | -- <sup>f</sup>                                   | -- <sup>f</sup> | -- <sup>f</sup> | 1.4                                           | 0.9-2.1         | 101.0           |
| <b>PFCs (serum)</b>     |                |                                     |                                                   |                 |                 |                                               |                 |                 |
| PFHpA                   | 19             | 21 (53%)                            | -- <sup>f</sup>                                   | -- <sup>f</sup> | -- <sup>f</sup> | -- <sup>e</sup>                               | -- <sup>e</sup> | -- <sup>e</sup> |
| PFOA                    | 34             | 10 (23%)                            | -- <sup>f</sup>                                   | -- <sup>f</sup> | -- <sup>f</sup> | 0.8                                           | 0.7-1.1         | 53.3            |

| Analyte (matrix)     | Complete pairs | N (%) incomplete pairs <sup>b</sup> | Cord:maternal ratio (lipid-adjusted) <sup>c</sup> |                 |                 | Cord:maternal ratio (wet-weight) <sup>d</sup> |                 |                 |
|----------------------|----------------|-------------------------------------|---------------------------------------------------|-----------------|-----------------|-----------------------------------------------|-----------------|-----------------|
|                      |                |                                     | Median                                            | IQR             | GCV             | Median                                        | IQR             | GCV             |
| PFNA                 | 61             | 3 (5%)                              | -- <sup>f</sup>                                   | -- <sup>f</sup> | -- <sup>f</sup> | 0.4                                           | 0.3-0.5         | 95.1            |
| PFUA                 | 53             | 7 (12%)                             | -- <sup>f</sup>                                   | -- <sup>f</sup> | -- <sup>f</sup> | 0.3                                           | 0.2-0.4         | 128.6           |
| PFOS                 | 64             | 0 (0%)                              | -- <sup>f</sup>                                   | -- <sup>f</sup> | -- <sup>f</sup> | 0.8                                           | 0.6-1.2         | 60.3            |
| PFOSA                | 56             | 4 (7%)                              | -- <sup>f</sup>                                   | -- <sup>f</sup> | -- <sup>f</sup> | 1.1                                           | 0.8-1.4         | 45.9            |
| N-Me-PFOSAA          | 60             | 4 (6%)                              | -- <sup>f</sup>                                   | -- <sup>f</sup> | -- <sup>f</sup> | 0.9                                           | 0.6-1.2         | 96.6            |
| N-Et-PFOSAA          | 29             | 15 (34%)                            | -- <sup>f</sup>                                   | -- <sup>f</sup> | -- <sup>f</sup> | 1.3                                           | 1.1-1.7         | 56.5            |
| Metals (whole blood) |                |                                     |                                                   |                 |                 |                                               |                 |                 |
| Cd                   | 0              | 51 (100%)                           | -- <sup>f</sup>                                   | -- <sup>f</sup> | -- <sup>f</sup> | -- <sup>e</sup>                               | -- <sup>e</sup> | -- <sup>e</sup> |
| Pb                   | 59             | 0 (0%)                              | -- <sup>f</sup>                                   | -- <sup>f</sup> | -- <sup>f</sup> | 0.6                                           | 0.6-0.7         | 29.8            |
| Hg                   | 59             | 0 (0%)                              | -- <sup>f</sup>                                   | -- <sup>f</sup> | -- <sup>f</sup> | 1.3                                           | 1.1-1.7         | 33.5            |

Abbreviations: MDL (method detection limit). GM (geometric mean). IQR (interquartile range [25th-75th percentile]). GCV (geometric coefficient of variation). See **Table S2** for full chemical names.

<sup>a</sup> Only compounds detected in at least 20 paired maternal samples are shown. Detection refers to a measured concentration  $\geq$  MDL. Paired samples for which chemicals were not detected in either the maternal nor cord sample were excluded. Unlike in the main text, ratios reported here are not conditional on maternal detection. That is, a small number of pairs for which chemicals were detected in the cord but not the maternal sample are included.

<sup>b</sup> The number of incomplete pairs refers to the number of paired observations where either the maternal or cord sample was  $<$  MDL, but not both.

<sup>c</sup> Substitution was performed using lipid-adjusted MDLs, which vary by sample depending on the lipid content of the sample.

<sup>d</sup> Substitution was performed using wet-weight MDLs.

<sup>e</sup> Percentiles and GCV are not reported when the percent of incomplete pairs was  $>$  50%.

<sup>f</sup> Not calculated for hydrophilic analytes.

## References

Woodruff, T. J.; Zota, A. R.; Schwartz, J. M. Environmental chemicals in pregnant women in the United States: NHANES 2003-2004. *Environ. Health Perspect.* **2011**, *119* (6), 878–885.
